# Supplementary material for: Genetic programming of macrophages to perform anti-tumor functions using targeted mRNA nanocarriers
Source: PubMed Central journal article supplement (PMC6722139; doi:10.1038/s41467-019-11911-5), 2019-09-03
Supplement: 41467_2019_11911_MOESM1_ESM.pdf [file 41467_2019_11911_MOESM1_ESM.pdf]

# Supporting Online Material for

## **Genetic programming of macrophages to perform anti-tumor functions**

### **using targeted mRNA nanocarriers**

F. Zhang<sup>1</sup>, N. N. Parayath<sup>1</sup>, C. I. Ene<sup>2</sup>, S. B. Stephan<sup>1</sup>, A. L. Koehne<sup>3</sup>, M. E. Coon<sup>1</sup>, E. C. Holland<sup>2,4,5</sup> & M. T. Stephan<sup>‡1,6,7</sup>

<sup>1</sup>Clinical Research Division, Fred Hutchinson Cancer Research Center, Seattle, Washington 98109, USA.

<sup>2</sup>Department of Neurological Surgery, University of Washington School of Medicine, Seattle, Washington, USA.

<sup>3</sup>Comparative Pathology, Fred Hutchinson Cancer Research Center, Seattle, Washington 98109, USA.

<sup>4</sup>Human Biology Division, Fred Hutchinson Cancer Research Center, Seattle, Washington 98109, USA.

<sup>5</sup>Alvord Brain Tumor Center, University of Washington, Seattle, Washington 98195, USA.

<sup>6</sup>Department of Bioengineering and Molecular Engineering & Sciences Institute, University of Washington, Seattle, Washington 98109, USA.

<sup>7</sup>Department of Medicine, Division of Medical Oncology, University of Washington, Seattle, Washington 98195, USA.

<sup>‡</sup>Correspondence should be addressed to M.T.S. ([mstephan@fredhutch.org](mailto:mstephan@fredhutch.org))

This PDF file includes:

Supplementary Figs. 1-5 with figure captions  
Supplementary Table 1

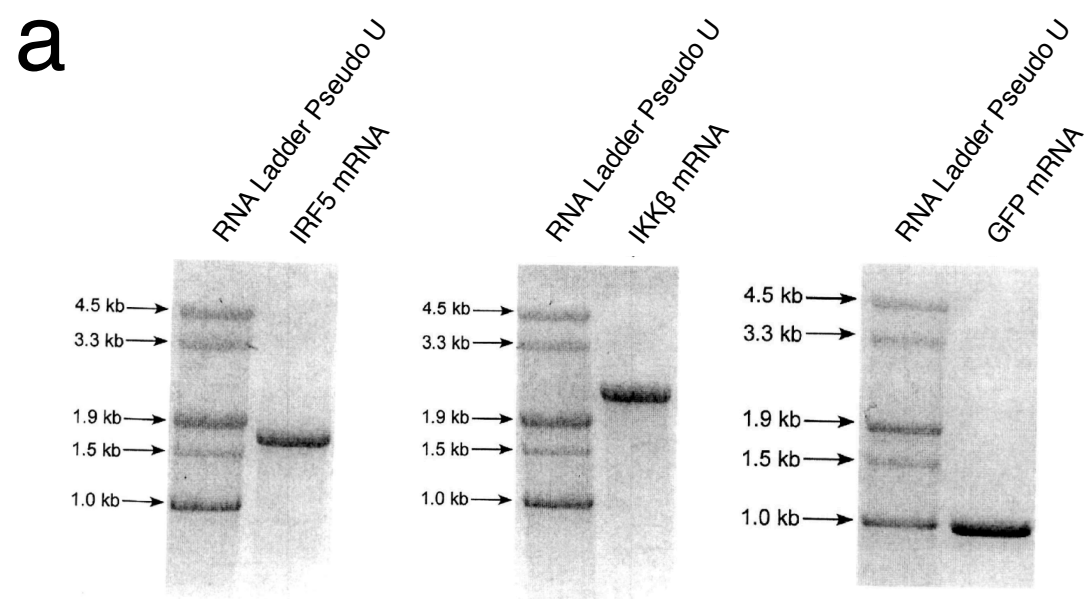

**b Sequencing result by PacBio:**  
 mIRF5 and mIKKb produced by TriLink were sequenced by Pacific Biosciences Inc. using their SMRT sequencing technology, under SMRT Link 5.1 Iso-Seq Pipeline. The sequencing experiment generated 382 (mIRF5) and 113 (mIKKb) polished high-quality isoforms.

**Screening of final mIRF5 and mIKKb isoform candidates:**

To identify the isoforms with the highest sequence alignment with the original mIRF5 and mIKKb sequences (this refers to the sequences we submitted to TriLink, therefore do not include ARCA cap, PolyA tails, and other base modifications), Nucleotide BLAST from NIH was used to screen all polished high-quality isoforms.

For mIRF5 isoforms screening, we found 37 out of 382 isoforms that have 100% alignment rates with the original sequence. Among these 37 isoforms, 17 have repeated match  $\geq 2$  (meaning dimmers or trimers). After excluding these 17 isoforms, we got 20 isoforms with 100% alignments with the original IRF5 sequence (sequence length = 1494). These 20 isoforms have sequence length between 1639 – 1965, which are in the similar range with the length of mIRF5 sequence reported by TriLink (sequence length = 1770).

For mIKKb isoforms screening, we found 10 out of 113 isoforms that have 100% alignment rates with the original sequence. Among these 10 isoforms, 5 have repeated match  $\geq 2$  (meaning dimmers or trimers). After excluding these 5 isoforms, we got 5 isoforms with 100% alignments with the original IKKb sequence (sequence length = 2150). These 5 isoforms have sequence length between 2305 – 2404, which are in the similar range with the length of mIKKb sequence reported by TriLink (sequence length = 2440).

All screened final mIRF5 and mIKKb sequence isoforms were uploaded as **Supplementary Data 1** and **2**, respectively.

**c** Calibration curve after third order polynomial fitting:  $NT = 0.1023 \cdot T^3 - 5.093 \cdot T^2 + 89.32 \cdot T^1 - 574.6 \cdot T^0$  (NT= nucleotide; T=time (min))

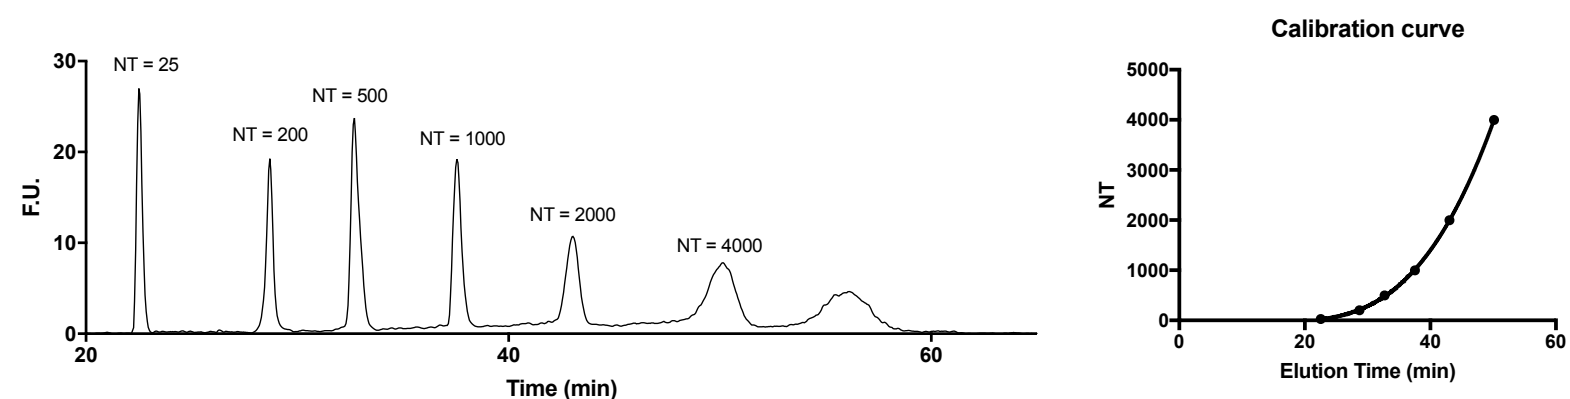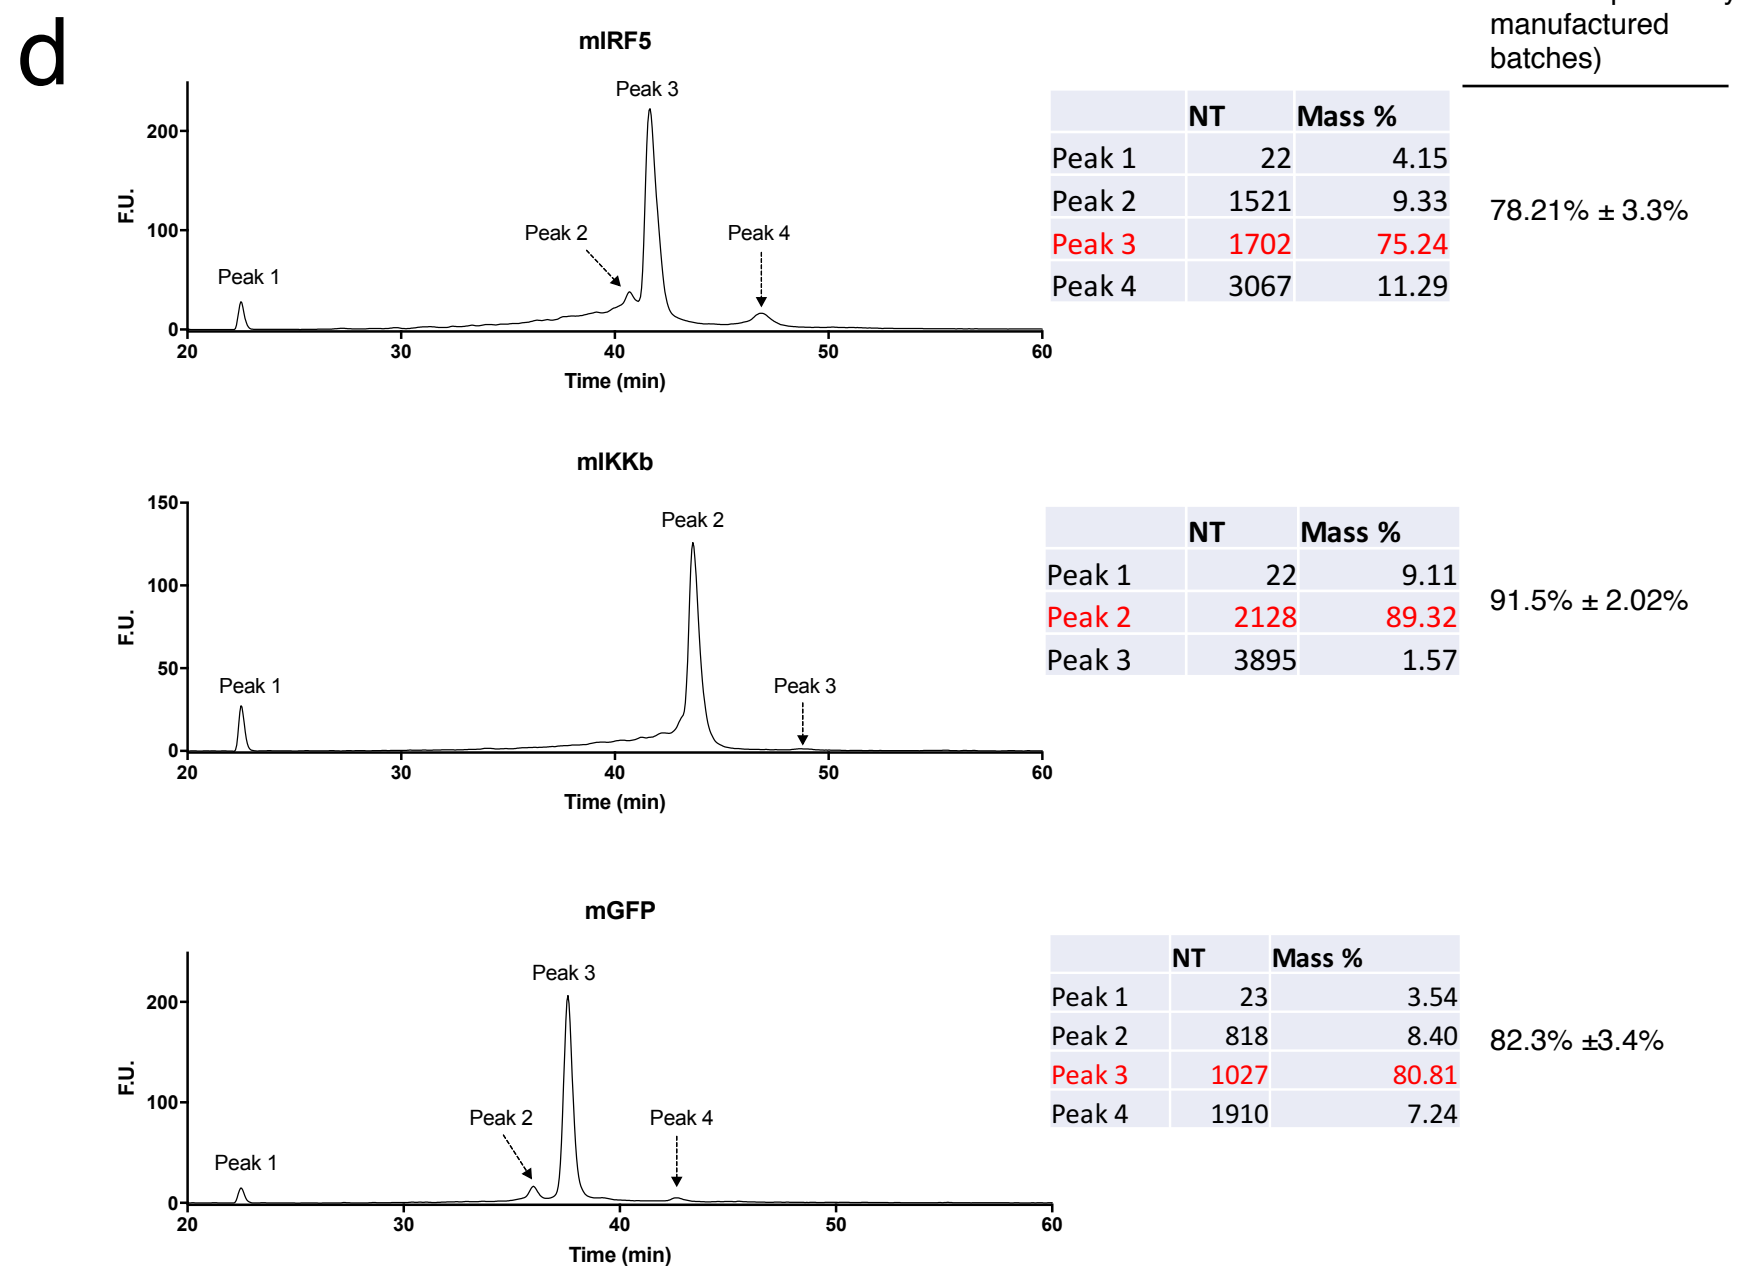

**Supplementary Fig. 1: Integrity and purity of IVT mRNA used in our experiments.** (a) Representative agarose gel electrophoresis of IVT mRNA encoding IRF5 (left panel), IKK $\beta$  (middle panel), and GFP (right panel). The expected size for mouse IRF5 mRNA is 1,770 bp, which includes the actual coding sequence (1,494 bp + the 5'UTR and the polyA track). The expected size for mouse IKK $\beta$  mRNA is 2,430 bp (2,154 bp + 5'UTR + polyA track), and that for the GFP control mRNA is 1,027 bp (996 bp + 5'UTR + polyA track). (b) Single Molecule Real-Time (SMRT) sequencing of IVT mRNA constructs. (c) Bioanalyzer electropherogram calibration curve. Representative curves of IVT mRNA encoding murine IRF5, IKK $\beta$ , and GFP are shown in (d). Based on the calibration curve, the major fractions (peak 3 for IRF5 and GFP and peak 2 for IKK $\beta$ ) represent the relevant single-stranded mRNA. The last fractions (peak 4 for IRF5 and GFP and peak 3 for IKK $\beta$ ) represent impurities from double-stranded mRNA. Mean purities (based on three independently manufactured mRNA batches) are shown on the right.

a

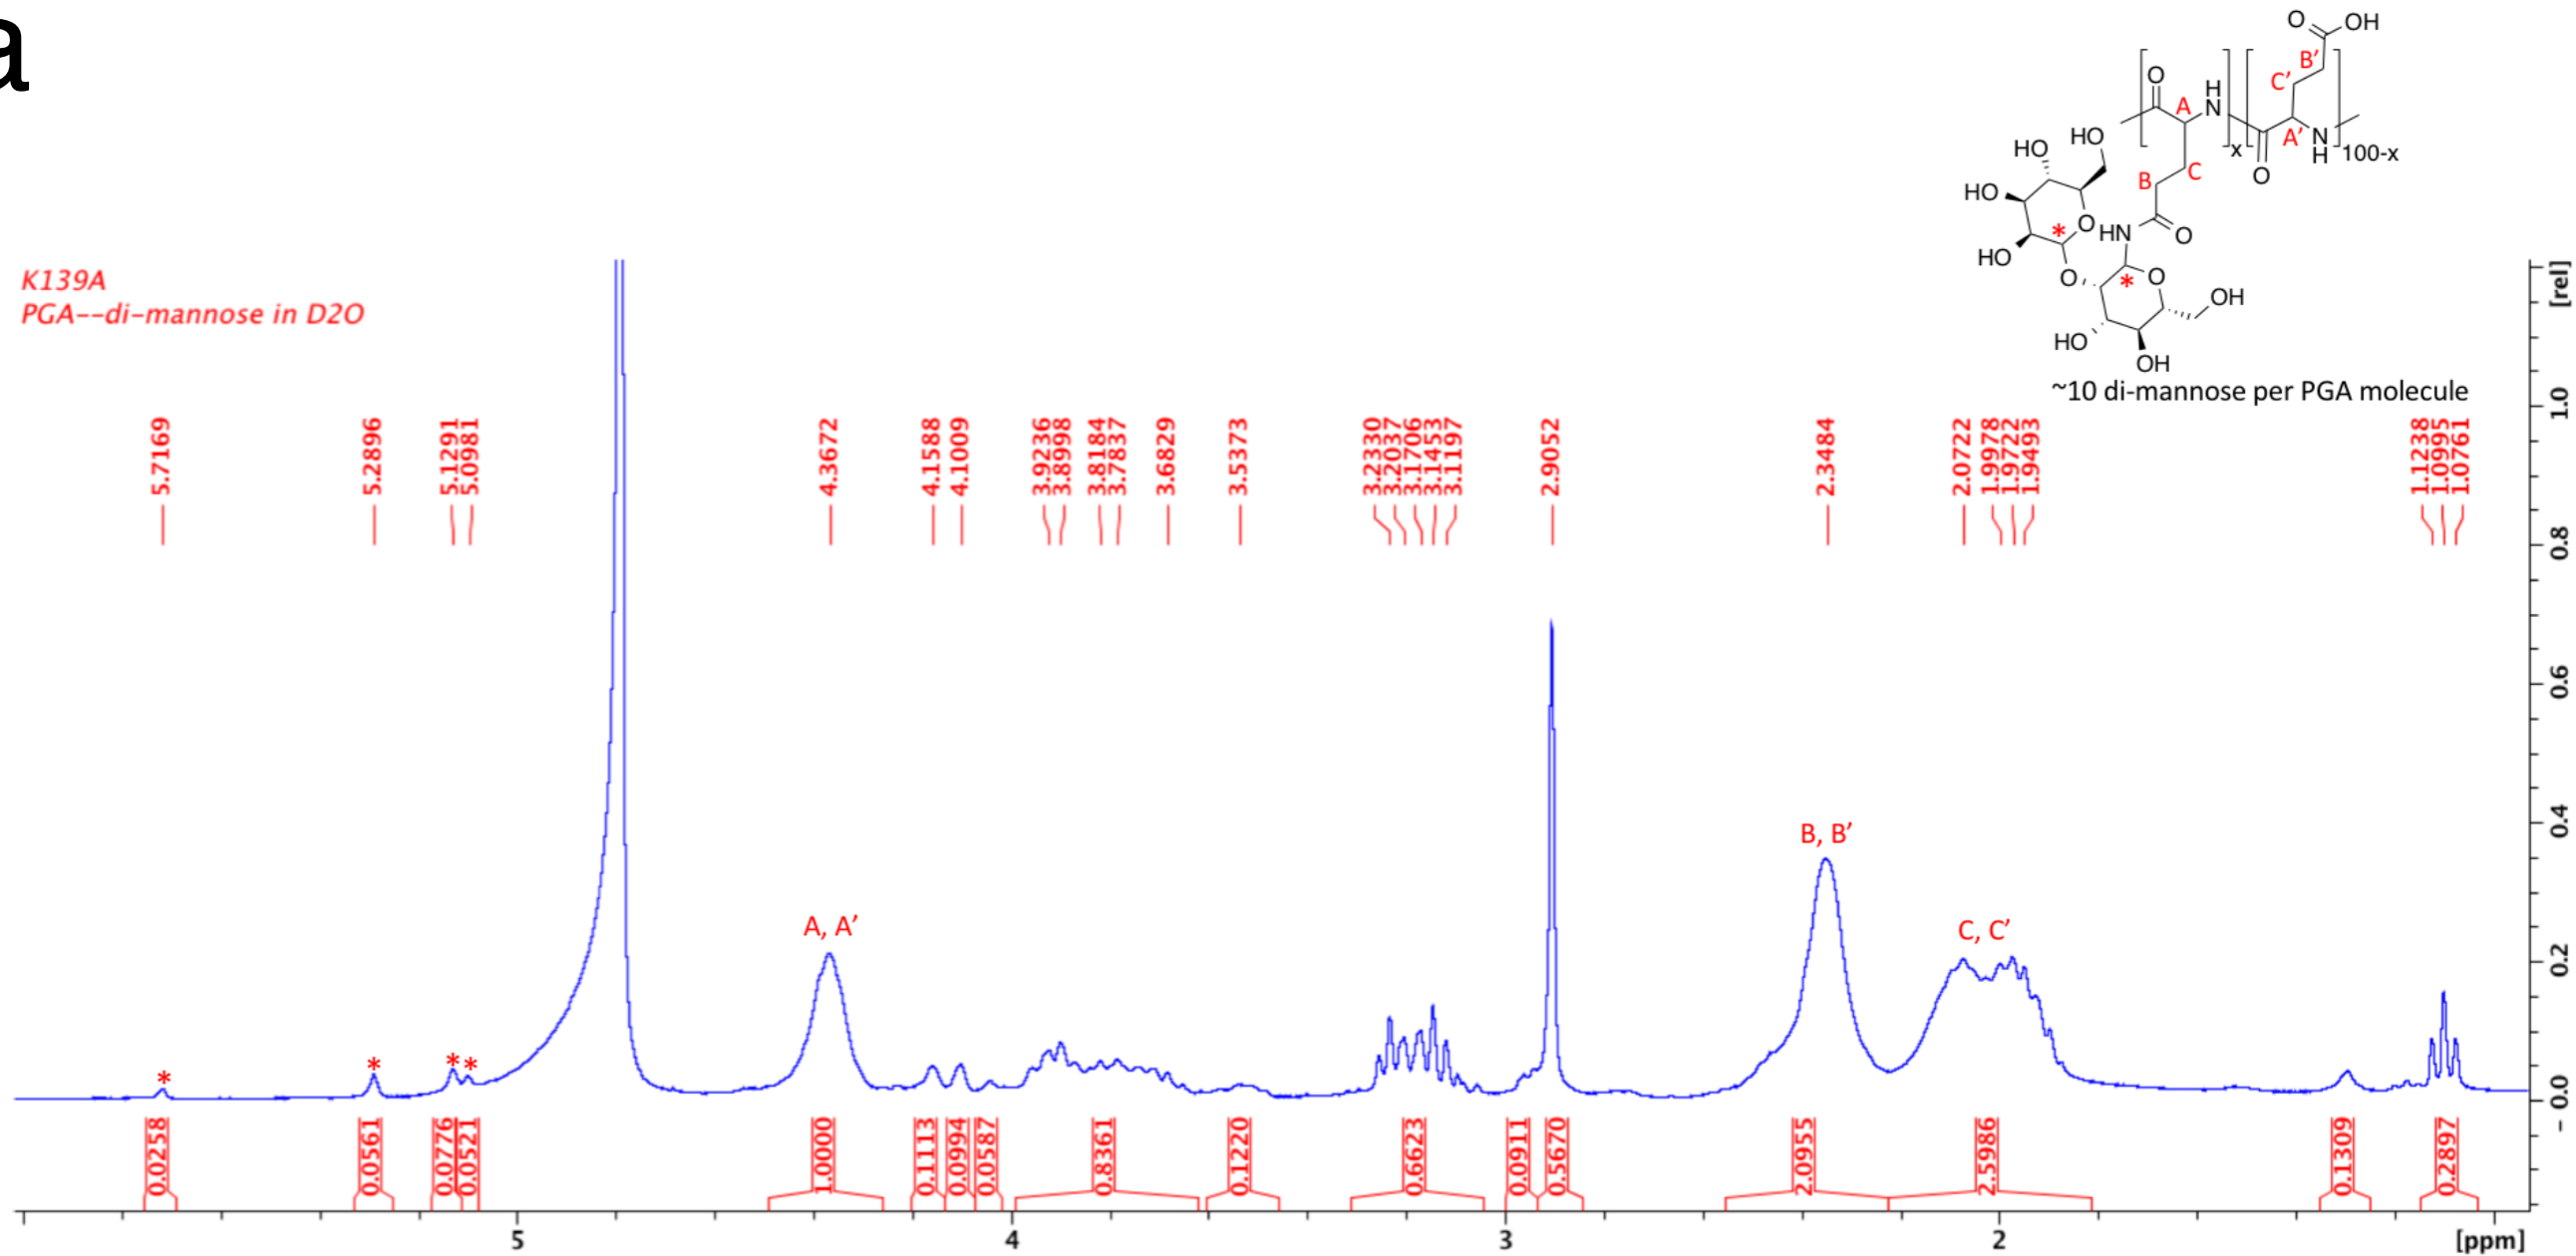

**Supplementary Fig. 2: (a) Efficient covalent coupling of Di-mannose to PGA polymer using EDC/NHS bioconjugation.** Representative <sup>1</sup>H NMR spectroscopy of polyglutamic acid (PGA) following functionalization with Di-mannose. We routinely used <sup>1</sup>H NMR spectroscopy in D<sub>2</sub>O (Bruker Avance, 300 Mhz) as a quality control for successful conjugation of Di-mannose to PGA. Peaks corresponding to the anomeric protons of Di-mannose were observed between 5.1 and 5.7 ppm. The ratio of Di-mannose to PGA was roughly estimated based on integration of the anomeric proton peaks (\*) and the PGA C-H peaks (A and A').

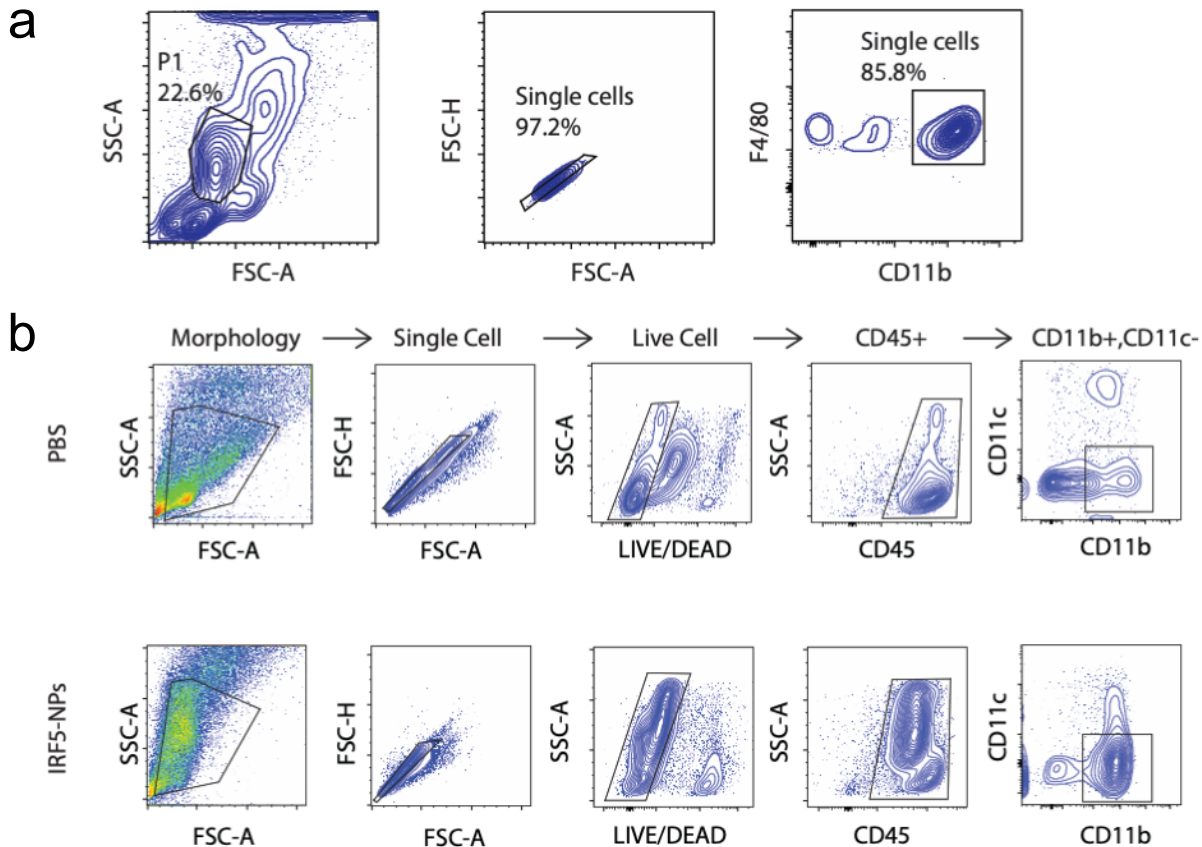

**Supplementary Fig. 3: Gating Strategies for multicolor flow cytometry analysis and cell sorting.** (a) FACS sequential gating strategies for isolating CD11b<sup>+</sup> and F4/80<sup>+</sup> peritoneal macrophages for Fig 3 i & j, *ex vivo* cytokine release study and qRT-PCR analysis of selected macrophage signature genes; (b) FACS sequential gating strategies for isolating CD45<sup>+</sup>, CD11b<sup>+</sup>, CD11c<sup>-</sup> peritoneal macrophages for Supplementary Fig. 4 nanoString's gene expression analysis.

M1 macrophage genes

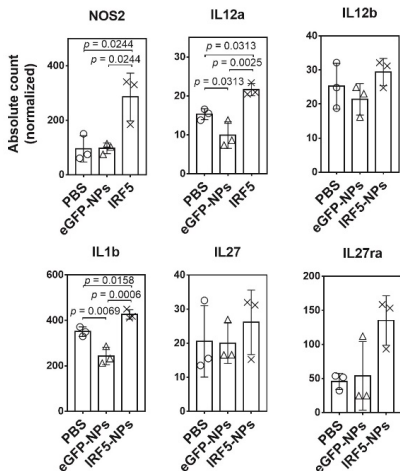

TAM genes

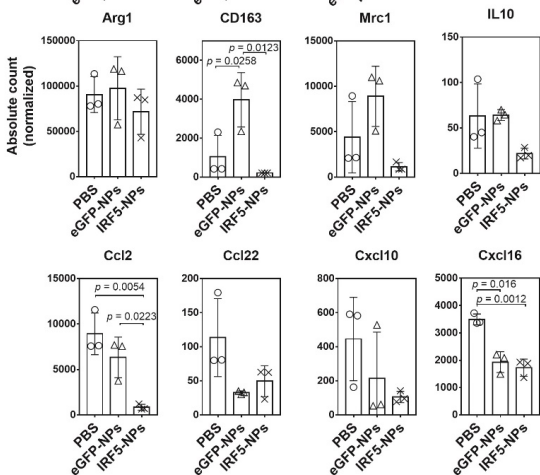

**Supplementary Fig. 4. Effects of IRF5/IKKb nanoparticles on inflammation-related genes among the 770 genes analyzed in NanoString's nCounter® Mouse Myeloid Innate Immunity Panel v2** (the complete gene list and expressions are available on NCBI's GEO repository, Accession number GSE129498). Nanoparticle transfection upregulated the expression of genes associated with M1-like inflammatory macrophages such as NOS2 (199% increase), IL12a (41% increase), IL12b (16% increase), IL1b (22% increase), IL27 (27% increase), IL27ra (194% increase), while downregulating the expression of genes associated TAMs such as Arg1 (21% decrease), CD163 (80% decrease), Mrc1 (or CD206) (74% decrease), IL10 (65% decrease), Ccl2 (90% decrease), Ccl22 (56% decrease), Cxcl10 (76% decrease), and Cxcl16 (51% decrease). Specifically, genes that were significantly changed between IRF5-NPs treated and PBS treated groups were NOS2 ( $P=0.0224$ ), IL12a ( $P=0.0313$ ), IL1b ( $P=0.0158$ ), Ccl2 ( $P=0.0054$ ), Cxcl16 ( $P=0.0016$ ).

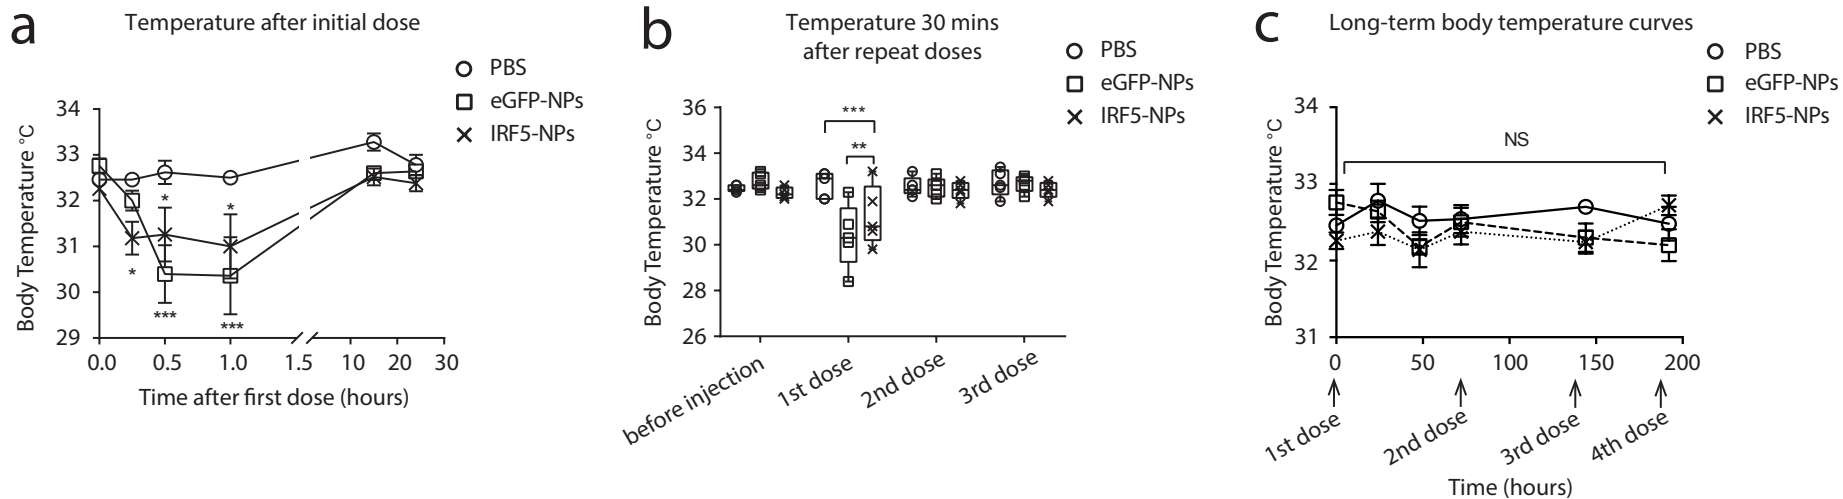

**Supplementary Fig. 5: Programming proinflammatory macrophages with IRF5/IKK $\beta$  nanoparticles does not trigger fever.** Body temperatures of C57BL/6 mice were serially monitored following repeated intravenous administration of nanoparticles loaded with mRNA (50  $\mu$ g/dose) encoding IRF5/IKK $\beta$  or control GFP. A third group of mice was injected with PBS. Body temperatures were measured using an infrared thermometer 0 h, 15 min, 30 min, 1 h, 15 h and 24 h after each treatment. **(a)** Temperature changes following the initial nanoparticle dose. Each point represents the mean  $\pm$  s.e.m. We noticed a significant  $\sim$ 1-2  $^{\circ}$ C drop in body temperature 30 min after treatment (with both eGFP-NPs and IRF5/IKK $\beta$ -NPs). Following all subsequent nanoparticle injections, body temperature remained normal, as shown in **(b)** and **(c)**. Data are from ten mice per treatment condition pooled from two independent experiments.

**Supplementary Table 1.** List of primary antibodies and other staining reagent used for flow cytometry, flow-assisted cell sorting analysis, immunohistochemistry analysis and immunofluorescence analysis.

**List of antibodies and other staining reagent used for flow cytometry and flow-assisted cell sorting analysis.**

| Antibody Specificity    | Clone       | Isotype      | Dilution | Dye           | Supplier          | Catalog# |
|-------------------------|-------------|--------------|----------|---------------|-------------------|----------|
| <b>Myeloid Panel</b>    |             |              |          |               |                   |          |
| CD45                    | 30-F11      | Rat IgG2b, k | 1:800    | eFluor 450    | eBioscience       | 48-0451  |
| MHC I-A/I-E             | M5/114.15.2 | Rat IgG2b, k | 1:400    | AlexaFluor700 | Biologend         | 107622   |
| CD11b                   | M1/70       | Rat IgG2b, k | 1:200    | APC           | BD Biosciences    | 557657   |
| CD11C                   | N418        | Arm Ham IgG  | 1:200    | PE-CF594      | BD Biosciences    | 562454   |
| Ly6C                    | HK1.4       | Rat IgG2a, k | 1:200    | PerCP-Cy5.5   | eBioscience       | 45-4932  |
| Ly6G                    | 1A8         | Rat IgG2a, k | 1:200    | APC-Cy7       | Biologend         | 127624   |
| CD206                   | C0682C2     | Rat IgG2a, k | 1:200    | PE-Dazzle 594 | Biologend         | 141732   |
| Live/Dead Fixable Green | -           | -            | 1:800    | FITC          | Life Technologies | L23101   |
| <b>Lymphoid Panel</b>   |             |              |          |               |                   |          |
| CD45                    | 30-F11      | Rat IgG2b, k | 1:800    | eFluor 450    | eBioscience       | 48-0451  |
| CD335 (Nkp46)           | 29A1.4      | Rat IgG2a, k | 1:200    | BUV737        | BD Biosciences    | 565085   |
| CD4                     | RM4-5       | Rat IgG2a, k | 1:400    | PerCP-Cy5.5   | Biologend         | 100540   |
| CD44                    | IM7         | Rat IgG2b, k | 1:400    | PE-CF594      | BD Biosciences    | 562464   |
| CD49B                   | HMa2        | Ham IgG      | 1:200    | BUV395        | BD Biosciences    | 740250   |
| CD62L                   | MEL-14      | Rat IgG2a, k | 1:200    | APC-Cy7       | Biologend         | 104428   |
| CD8                     | 53-6.7      | Rat IgG2a, k | 1:400    | APC           | Biologend         | 100712   |
| TCR- $\beta$ chain      | B20.6       | Rat IgG2a, k | 1:400    | PE            | Biologend         | 127908   |
| Live/Dead Fixable Green | -           | -            | 1:800    | FITC          | Life Technologies | L23101   |
| <b>Other antibodies</b> |             |              |          |               |                   |          |
| F4/80                   | BM8         | Rat IgG2a, k | 1:400    | PE            | eBioscience       | 12-4801  |
| 7AAD                    | -           | -            | 1:400    | -             | Biologend         | 420404   |
| Trustain fcX            | 93          | Rat IgG2a, k | 1:400    | -             | Biologend         | 101320   |

**List of antibodies used for immunohistochemistry analysis and immunofluorescence analysis.**

| <b>Antibody Specificity</b> | <b>Clone</b> | <b>Isotype</b>       | <b>Dilution</b> | <b>Dye</b> | <b>Supplier</b>                      | <b>Catalog#</b> |
|-----------------------------|--------------|----------------------|-----------------|------------|--------------------------------------|-----------------|
| Ly6B.2                      | 7/4          | Rat IgG2a            | 1:7500          | -          | Bio-Rad                              | MCA771GA        |
| F4/80                       | D2S9R        | Rabbit IgG           | 1:6000          | -          | Cell Signaling                       | 770765          |
| CD4                         | 4SM95        | Rat IgG1, k          | 1:4000          | -          | eBioscience                          | 14-976-32       |
| CD8a                        | 4SM15        | Rat IgG2a,<br>lambda | 1:4000          | -          | eBioscience                          | 14-0808-82      |
| Cytokeratin 8/18            |              | Rat IgG2a, k         | 1:100           | -          | University of Iowa<br>Hybridoma Bank | TROMA-1         |
| DAPI                        | -            | -                    | 5 µg/ml         | -          | Sigma                                | 8417 –<br>10MG  |
